# Supplementary material for: Evaluation of the Impact of Catheter Ablation Procedure on Outcomes and Economic Burden in Patients with Atrial Fibrillation: Real-World Data from Italian Administrative Databases
Source: MDPI journal article supplement (doi:10.3390/healthcare10122561), 2022-12-17
Supplement: s1 [file s1]

*Supplementary material*

**Supplementary Table S1.** Characteristics of AF patients with and without trans-catheter ablation procedure, post PSM.

|                                                     | Patients with ablation | Patients without ablation | P-value | SMD   |
|-----------------------------------------------------|------------------------|---------------------------|---------|-------|
| Patients, n                                         | 3,067                  | 18,402                    | -       |       |
| Age (years) at ablation procedure, mean (SD)        | 63.1 (12.4)            | 67.3 (12.9)               | <0.001  | 0.333 |
| Males, n (%)                                        | 2,064 (67.3)           | 11,572 (62.9)             | <0.001  | 0.093 |
| Tumors, n (%)                                       | 38 (1.2)               | 283 (1.5)                 | 0.207   | 0.026 |
| COPD, n (%)                                         | 703 (22.9)             | 4,585 (24.9)              | 0.018   | 0.047 |
| Diabetes mellitus, n (%)                            | 434 (14.2)             | 3,082 (16.7)              | <0.001  | 0.072 |
| CKD, n (%)                                          | 102 (3.3)              | 610 (3.3)                 | 0.975   | 0.001 |
| Hyperthension, n (%)                                | 2,631 (85.8)           | 15,981 (86.8)             | 0.013   | 0.047 |
| Antiarrhythmics, n (%)                              | 2,259 (73.7)           | 13,061 (71.0)             | 0.002   | 0.060 |
| Beta-blockers, n (%)                                | 2103 (68.6)            | 12,420 (67.5)             | 0.238   | 0.023 |
| Calcium channel blockers, n (%)                     | 708 (23.1)             | 4,787 (26.0)              | 0.001   | 0.068 |
| Anticoagulants, n (%)                               | 2,642 (86.1)           | 15,882 (86.3)             | 0.808   | 0.005 |
| Coronary artery disease hospitalizations, n (%)     | 240 (7.8)              | 1,408 (7.7)               | 0.738   | 0.007 |
| Cerebrovascular disease hospitalizations, n (%)     | 97 (3.2)               | 639 (3.5)                 | 0.383   | 0.017 |
| Heart failure hospitalizations, n (%)               | 457 (14.9)             | 2,145 (11.7)              | <0.001  | 0.096 |
| Peripheral vascular disease hospitalizations, n (%) | 19 (0.6)               | 133 (0.7)                 | 0.528   | 0.013 |
| PTCA hospitalizations, n (%)                        | 92 (3.0)               | 484 (2.6)                 | 0.241   | 0.022 |

CKD, chronic kidney disease; COPD, chronic obstructive pulmonary disease; PSM, propensity score matching; PTCA, percutaneous coronary angioplasty; SD, standard deviation; SMD, standardized mean difference.
